# Supplementary material for: Characterisation of canine KCNIP4: A novel gene for cerebellar ataxia identified by whole-genome sequencing two affected Norwegian Buhund dogs
Source: PLoS Genet. 2020 Jan 30;16(1):e1008527. doi: 10.1371/journal.pgen.1008527 (PMC7012447; doi:10.1371/journal.pgen.1008527)
Supplement: S2 Table — (XLSX) [file pgen.1008527.s002.xlsx]

## Sheet: Sheet1
Breed	Total	T/T	T/C	C/C
Affenpinscher	3	3	0	0
Afghan Hound	3	3	0	0
Airedale Terrier	3	3	0	0
Alaskan Malamute	3	3	0	0
American Bulldog	3	3	0	0
American Cocker Spaniel	3	3	0	0
Australian Cattle Dog	3	3	0	0
Australian Kelpie	3	3	0	0
Australian Shepherd	3	3	0	0
Basset Fauve De Bretagne	3	3	0	0
Basset Hound	3	3	0	0
Beagle	3	3	0	0
Bearded collie	3	3	0	0
Belgian Shepherd Dog (Groenendael)	1	1	0	0
Belgian Shepherd Dog (Tervueren)	2	2	0	0
Berger Picard	3	3	0	0
Bloodhound	3	3	0	0
Border Collie	3	3	0	0
Border Terrier	3	3	0	0
Borzoi	3	3	0	0
Boston Terrier	3	3	0	0
Boxer	3	3	0	0
Brittany Spaniel	3	3	0	0
Bull Terrier	3	3	0	0
Bulldog	3	3	0	0
Catalan Sheepdog	3	3	0	0
Cavalier King Charles Spaniel	3	3	0	0
Cesky Terrier	2	2	0	0
Chesapeake Bay Retriever	3	3	0	0
Chow Chow	2	2	0	0
Cocker Spaniel	3	3	0	0
Curly Coated Retriever	3	3	0	0
Dalmatian	3	3	0	0
Dandie Dinmont	3	3	0	0
Doberman	3	3	0	0
English Setter	3	3	0	0
English Springer Spaniel	3	3	0	0
Field Spaniel	3	3	0	0
Finnish Lapphund	3	3	0	0
Flat Coated Retriever	3	3	0	0
French Bull Dog	3	3	0	0
German Pinscher	3	3	0	0
German Shepherd Dog	3	3	0	0
German Spitz (Klein)	2	2	0	0
German Wire-haired Pointer	3	3	0	0
Giant Schnauzer	3	3	0	0
Glen of Imaal Terrier	3	3	0	0
Golden Retriever	3	3	0	0
Gordon Setter	3	3	0	0
Grand Basset Griffon Vendeen	3	3	0	0
Great Dane	3	3	0	0
Greater Swiss Mountain Dog	3	3	0	0
Greyhound	3	3	0	0
Havanese	3	3	0	0
Hovawart	3	3	0	0
Icelandic Sheepdog	3	3	0	0
Irish Red and White Setter	3	3	0	0
Irish Setter	3	3	0	0
Irish Water Spaniel	3	3	0	0
Italian Greyhound	3	3	0	0
Italian Spinone	3	3	0	0
Jack Russell Terrier	3	3	0	0
Japanese Akita	3	3	0	0
Japanese Shiba Inu	3	3	0	0
Keeshond	3	3	0	0
Labrador Retriever	3	3	0	0
Lagotto Romagnolo	3	3	0	0
Lakeland Terrier	3	3	0	0
Lancashire Heeler	3	3	0	0
Large Münsterländer	3	3	0	0
Leonberger	3	3	0	0
Lhasa Apso	3	3	0	0
Long-Haired Dachshund (Standard)	3	3	0	0
Manchester Terrier	3	3	0	0
Miniature Smooth Haired Dachshund	3	3	0	0
Miniature Bull Terrier	3	3	0	0
Miniature Long-haired Dachshund	3	3	0	0
Miniature Schnauzer	3	3	0	0
Miniature Wire Haired Dachshund	3	3	0	0
Norfolk Terrier	3	3	0	0
Northern Inuit	3	3	0	0
Norwegian Elkhound	3	3	0	0
Norwich terrier	3	3	0	0
Nova Scotia Duck Tolling Retrievers	3	3	0	0
Old English Mastiff	3	3	0	0
Old English Sheepdog	3	3	0	0
Otterhound	3	3	0	0
Parson Russel Terrier	3	3	0	0
Pembroke Welsh Corgi	3	3	0	0
Petit Basset Griffon Vendeen	3	3	0	0
Pharaoh Hound	3	3	0	0
Polish Lowland Sheepdog	3	3	0	0
Pug	2	2	0	0
Rhodesian Ridgeback	3	3	0	0
Rough Collie	3	3	0	0
Saint Bernard	3	3	0	0
Saluki	3	3	0	0
Samoyed	3	3	0	0
Scottish Deerhounds	3	3	0	0
Scottish Terrier	3	3	0	0
Shar Pei	3	3	0	0
Shetland Sheepdogs	3	3	0	0
Shih Tzu	3	3	0	0
Siberian Husky	3	3	0	0
Skye Terrier	3	3	0	0
Smooth Haired Dachshund (Standard)	3	3	0	0
Soft-coated Wheaten Terrier	3	3	0	0
Staffordshire Bull Terrier	3	3	0	0
Standard Poodle	3	3	0	0
Standard Schnauzer	3	3	0	0
Swedish Vallhund	3	3	0	0
Tibetan Spaniel	3	3	0	0
Tibetan Terrier	3	3	0	0
Utonagan	3	3	0	0
Vizsla (smooth coat)	3	3	0	0
Vizsla (Wire-haired)	3	3	0	0
Weimaraner	3	3	0	0
Welsh Springer Spaniel	3	3	0	0
West Highland White Terrier	3	3	0	0
Whippet	3	3	0	0
Wire-haired Dachshund	3	3	0	0
Working Sheepdog	3	3	0	0
